# Supplementary material for: Lipoic Acid Combined with Melatonin Mitigates Oxidative Stress and Promotes Root Formation and Growth in Salt-Stressed Canola Seedlings (Brassica napus L.)
Source: MDPI journal article supplement (doi:10.3390/molecules26113147), 2021-05-25
Supplement: s1 [file s1]

## Supplementary Materials

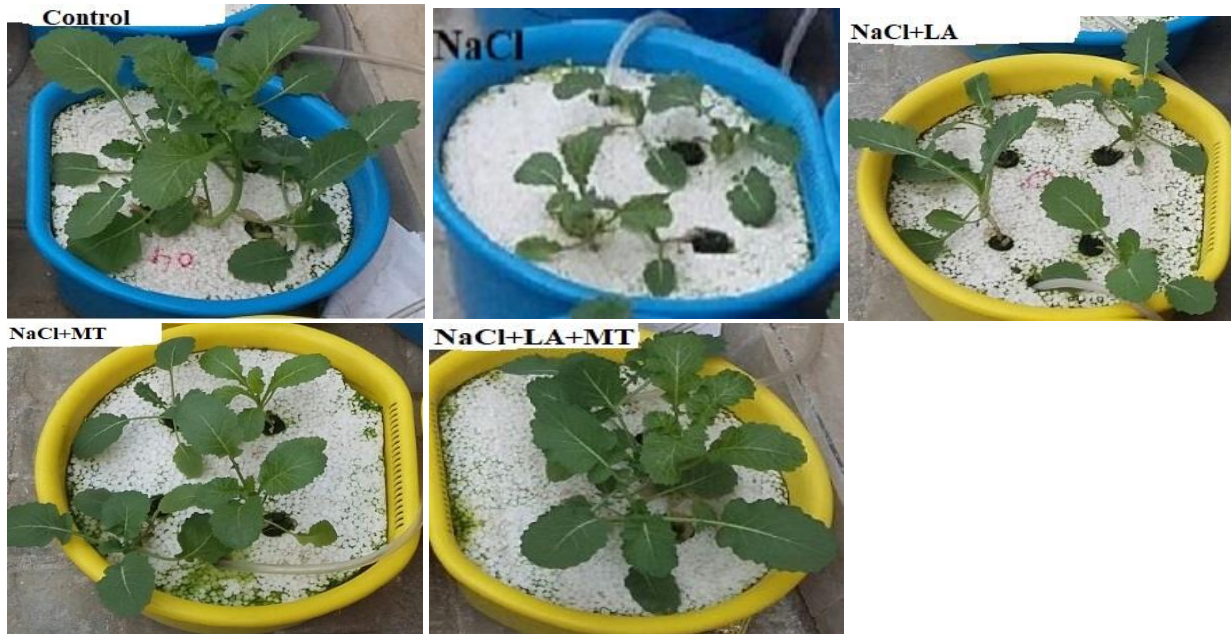

**Figure S1.** Influence of lipoic acid (LA) and melatonin (MT) and their combination (LA+MT) on the growth of canola seedlings under salt stress (S; 100 mM NaCl)

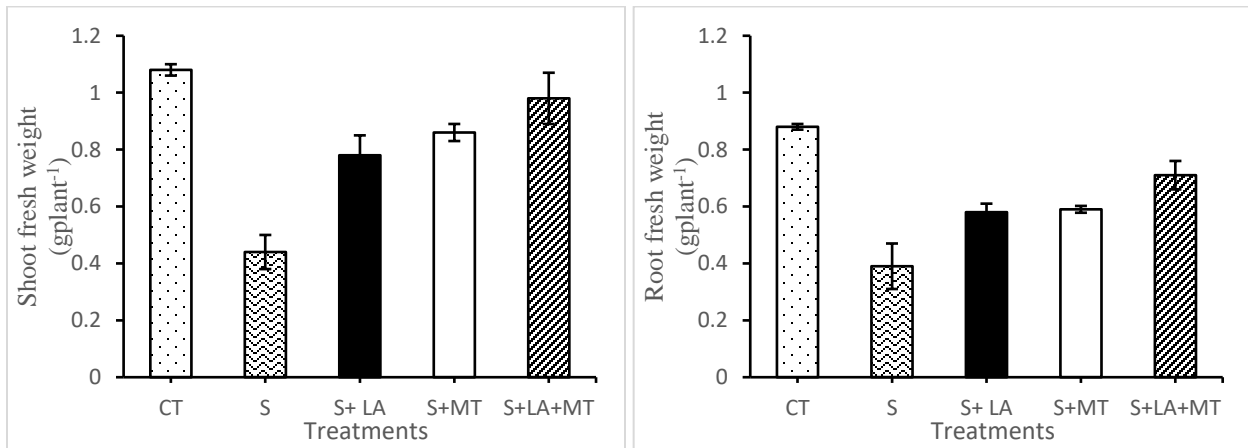

**Figure S2.** The influence of lipoic acid (LA), melatonin (MT) and their combination (LA+MT) on the morphology of canola seedlings under salt stress (S; 100 mM NaCl)

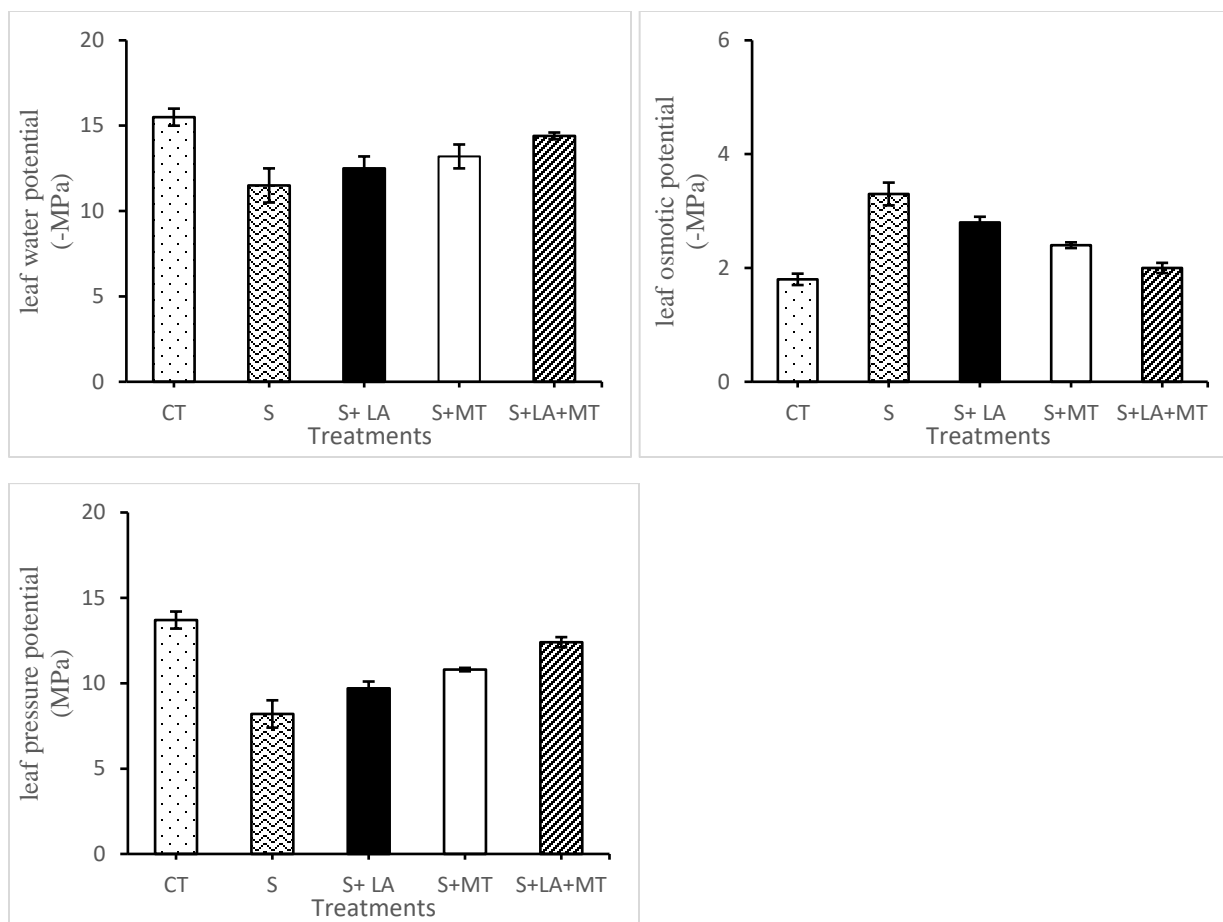

**Figure S3.** The influence of lipoic acid (LA), melatonin (MT) and their combination (LA+MT) on the water relation of canola seedlings under salt stress (S; 100 mM NaCl)

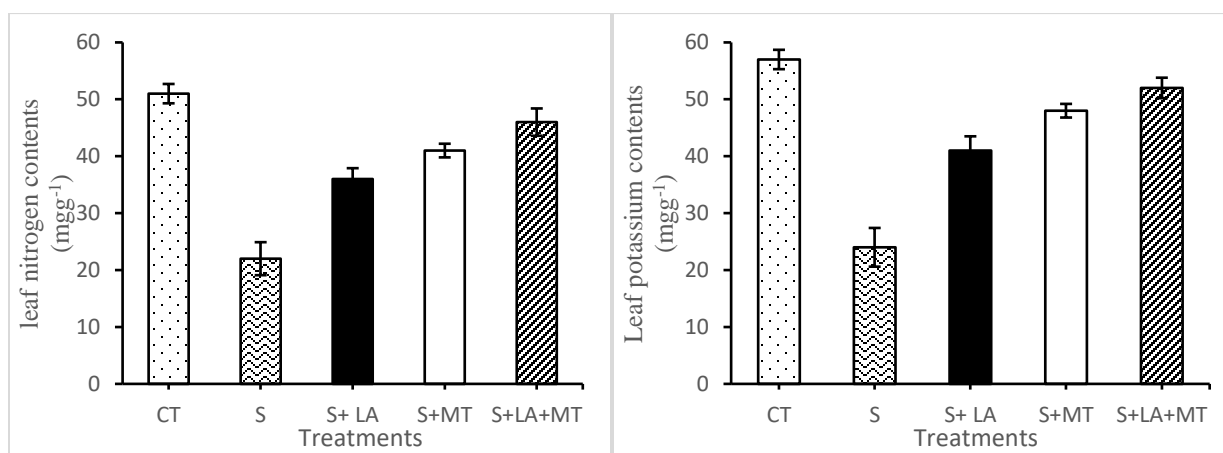

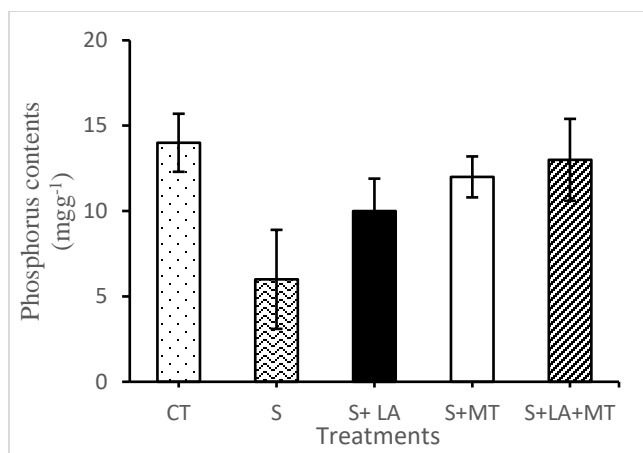

**Figure S4.** The influence of lipoic acid (LA), melatonin (MT) and their combination (LA+MT) on the leaf minerals composition of canola seedlings under salt stress (S; 100 mM NaCl)
